# Supplementary material
Source: Research Square preprint supplement (doi:10.21203/rs.3.rs-9514025/v1)
Supplement: Supplementary file 1 [file 2463068c8ed3d5398284633e.docx]

Scheme 1. Structures and syntheses of tested *N*-CF3 benzimidazole derivatives.
