# Supplementary material
Source: Research Square preprint supplement (doi:10.21203/rs.3.rs-9514025/v1)
Supplement: Supplementary file 2 [file 85ac885ceb56a34e77a06d7f.docx]

***Supporting Information***

**Discovery, synthesis, and anti-cancer activity of** ***N*-CF3-****benzimidazoles**

Qigang Sun1,+, Jia-Yi Li2,+, Qingjiang Li2,* and Yu Zhang3,*

1 Department of Hepatobiliary and Pancreatic Surgery, Hainan General Hospital, Hainan Affiliated Hospital of Hainan Medical University, Haikou 570311, China

2 State Key Laboratory of Anti-Infective Drug Discovery and Development, Guangdong Provincial Key Laboratory of Chiral Molecule and Drug Discovery, School of Pharmaceutical Sciences, Sun Yat-sen University, Guangzhou 510006, China

3 School of Pharmaceutical Science, Hengyang Medical School, University of South China, Hengyang 421001, China

* Correspondence: zyu-708@foxmail.com; liqingj3@mail.sysu.edu.cn.

+ These authors contributed equally to this work.

**Table of Contents**

[1. General information 3](#_Toc227143097)

[2. Preparation and characterization of starting materials 4](#_Toc227143098)

[3. Preparation and characterization of compounds **36-39** 6](#_Toc227143099)

[4. Synthesis and characterization of compounds **28-35** 8](#_Toc227143100)

[5. References 14](#_Toc227143101)

[6. NMR spectrum of starting materials and products 15](#_Toc227143102)

1. General information

Unless otherwise noted, all commercially available materials were used without further purification. Anhydrous DCM, CH3CN, DCE, DMF and THF were purchased from Energy Organics and stored under argon.

NMR–spectra were recorded on Bruker Avance III–400M and Ascend TM 500M in solvents as indicate. Chemical shifts (δ) are given in ppm relative to tetramethylsilane (δ = 0). The residual solvent signals were used as references and the chemical shifts converted to the TMS scale. The following abbreviations were used to describe peak splitting patterns: s (singlet), bs (broad singlet), d (doublet), t (triplet), q (quartet), m (multiplet), dd (doublet of doublets), dt (doublet of triplets). tt (triplet of triplets), td (triplet of doublets), ddd (doublet of doublet of doublets), qd (quartet of doublets). Coupling constants (*J*) were reported in hertz unit (Hz). 19F NMR was obtained with 1H not decoupling unless otherwise stated.

High–resolution mass spectra (HRMS, LCMS-IT-TOP) were recorded on a Bruker VPEXII spectrometer with ESI mode unless otherwise stated.

Analytical thin layer chromatography was performed on Polygram SIL G/UV254 plates. Visualization was accomplished by UV light (254 nm), or KMnO4 staining solutions followed by heating, also by gas chromatograph-mass spectrometer analysis (GC-MS) on Agilent Technologies 5977A MSD. Flash column chromatography was performed using silica gel (200–300 mesh).

1. Preparation and characterization of starting materials

**2.1 General procedure for the synthesis of *o*-diisocyanoarenes**

**Step A**: Under a nitrogen atmosphere, 4,5-dibromobenzene-1,2-diamine (1.06 g, 4.0 mmol,1.0 equiv), aryl boronic acid (10.0 mmol, 2.5 equiv), and Pd(PPh3)4 (138.6 mg, 0.12 mmol, 3 mol%) were dissolved in toluene (80 mL). K2CO3 (8.29 g, 60.0 mmol, 15.0 equiv) in water (26.7 mL) was then added to the mixture under nitrogen, and the resulting solution was stirred at 85 ºC for 12 h. After completion of the reaction, water (60.0 mL) was added, and the mixture was extracted with DCM. The organic layer was washed with brine, dried over anhydrous Na2SO4, and concentrated under reduced pressure. The crude product was purified by flash silica gel column chromatography to afford diamine **Int1** – **Int4**, which was used directly in the subsequent synthesis.[1]

**Step B**: An equimolar mixture of formic acid and acetic anhydride (with a slight excess of formic acid) was stirred at 55 °C for 2 h to in situ form formic acetic anhydride (12.0 mmol, 4.0 equiv). This mixture was added dropwise to a solution of diamine **Int1** – **Int4** (3.0 mmol, 1.0 equiv) in DCM (5.0 mL) at 0 °C. After stirring at room temperature for 2-3 h, the reaction mixture was filtered and concentrated in vacuo. Without further purification, the resulting residue was dissolved in DCM (25 mL), and Et3N (6.0 equiv) was added. The mixture was cooled to 0 °C, followed by the dropwise addition of POCl3 (2.4 equiv). The reaction mixture was stirred at this temperature for 2-3 h. A saturated aqueous Na2CO3 solution was then added very carefully (caution: exothermic reaction!). After stirring at room temperature for at least 1 h, the aqueous phase was extracted with DCM three times. The combined organic phases were dried over anhydrous Na2SO4 and concentrated in vacuo. The crude product was purified by silica gel column chromatography to afford pure *o*-diisocyanoarene **S1** – **S4**.[2]

**4,4''-difluoro-4',5'-diisocyano-1,1':2',1''-terphenyl (S1)**

The title compound was obtained in 33% yield (412.2 mg) over 3 steps as a brown solid after column chromatography (eluent = petroleum ether/ethyl acetate 20:1 v/v). **1H NMR** (400 MHz, Chloroform-*d*) δ 7.51 (s, 2H), 7.06 – 7.01 (m, 4H), 7.00 – 6.94 (m, 4H). **19F NMR** (376 MHz, Chloroform-*d*) δ -112.72 (tt, *J* = 8.1, 5.3 Hz). **13C NMR** (101 MHz, Chloroform-*d*) δ 172.6, 162.7 (d, *J* = 249.4 Hz), 142.0, 133.9 (d, *J* = 3.6 Hz), 131.3 (d, *J* = 8.4 Hz), 129.3, 122.8, 115.9 (d, *J* = 21.7 Hz). **HRMS (ESI)**: calc. for C20H10F2N2 [M]+: 317.0885; found: 317.0889.

**4',5'-diisocyano-4,4''-bis(trifluoromethyl)-1,1':2',1''-terphenyl (S2)**

The title compound was obtained in 12% yield (206.0 mg) over 3 steps as a brown solid after column chromatography (eluent = petroleum ether/ethyl acetate 15:1 v/v). **1H NMR** (500 MHz, Chloroform-*d*) δ 7.57 (s, 2H), 7.56 (d, *J* = 8.4 Hz, 4H), 7.20 (d, *J* = 8.0 Hz, 4H).**19F NMR** (376 MHz, Chloroform-*d*) δ -62.78. **13C NMR** (126 MHz, Chloroform-*d*) δ 173.6, 141.6, 141.1, 130.9 (q, *J* = 32.7 Hz), 129.9, 129.5, 125.9 (q, *J* = 3.7 Hz), 123.8 (q, *J* = 272.5 Hz), 123.5. **HRMS (ESI)**: calc. for C22H11F6N2 [M+H]+: 417.0821; found: 417.0827.

**4',5'-diisocyano-4,4''-dimethoxy-1,1':2',1''-terphenyl (S3)**

The title compound was obtained in 22% yield (303.7 mg) over 3 steps as a red solid after column chromatography (eluent = petroleum ether/ethyl acetate 10:1 v/v). **1H NMR** (400 MHz, Chloroform-*d*) δ 7.46 (s, 2H), 7.03 – 6.97 (m, 4H), 6.84 – 6.77 (m, 4H), 3.79 (s, 6H). **13C NMR** (101 MHz, Chloroform-*d*) δ 171.7, 159.5, 142.6, 130.7, 130.5, 129.1, 122.1, 114.1, 55.4. **HRMS (ESI)**: calc. for C22H17N2O2 [M+H]+: 341.1285; found: 341.1273.

**4',5'-diisocyano-4,4''-dinitro-1,1':2',1''-terphenyl (S4)**

The title compound was obtained in 9% yield (133.3 mg) over 3 steps as a white solid after column chromatography (eluent = petroleum ether/ethyl acetate 10:1 v/v). **1H NMR** (500 MHz, DMSO-*d*6) δ 8.16 (d, *J* = 8.6 Hz, 4H), 8.11 (s, 2H), 7.44 (d, *J* = 8.7 Hz, 4H). **13C NMR** (126 MHz, DMSO-*d*6) δ 171.8, 147.1, 143.8, 140.5, 131.2, 129.6, 123.6, 122.6. **HRMS (ESI)**: calc. for C20H11N4O4 [M+H]+: 371.0775; found: 371.0765.

1. Preparation and characterization of compounds 36-39

**3.1 General procedure for the synthesis of 2-iodo-*N*-CF3 benzoimidazoles**[3]

Under an inert atmosphere, a 10 mL Schlenk tube equipped with a magnetic stir bar was charged with *o*-diisocyanoarenes (0.1 mmol, 1.0 equiv), silver fluoride (88.7 mg, 0.7 mmol, 7.0 equiv), and *N*-iodosuccinimide (44.6 mg, 0.2 mmol, 2.0 equiv). DCE (2.0 mL) was added, and the mixture was stirred at room temperature for 10 min. Upon completion, the reaction mixture was filtered through a short pad of Celite and washed with ethyl acetate (15.0 mL). The combined filtrates were concentrated under reduced pressure, and the crude product was purified by column chromatography on silica gel using petroleum ether/ethyl acetate (PE/EA) as eluent to afford the pure product **36**-**39**.

**5,6-bis(4-fluorophenyl)-2-iodo-1-(trifluoromethyl)-1H-benzo[d]imidazole (36)**

The title compound was obtained in 45% yield (22.5 mg) as a white solid after column chromatography (eluent = petroleum ether/ethyl acetate 40:1 v/v). **1H NMR** (400 MHz, Chloroform-*d*) δ 7.74 (s, 1H), 7.58 (s, 1H), 7.10 – 7.05 (m, 4H), 6.99 – 6.89 (m, 4H). **19F NMR** (376 MHz, Chloroform-*d*) δ -51.77 (s, 3F), -115.11 (tt, *J* = 9.5, 5.2 Hz, 1F), -115.42 (tt, *J* = 9.5, 5.5 Hz, 1F). **13C NMR** (126 MHz, Chloroform-*d*) δ 162.1 (d, *J* = 247.1 Hz), 162.0 (d, *J* = 246.7 Hz), 144.7, 138.0, 137.2, 136.9 (d, *J* = 3.5 Hz), 136.6 (d, *J* = 3.3 Hz), 133.5, 131.74 (d, *J* = 8.0 Hz), 131.70 (d, *J* = 8.1 Hz), 121.3, 119.0 (d, *J* = 266.5 Hz), 115.4 (d, *J* = 3.2 Hz), 115.2 (d, *J* = 3.1 Hz), 113.4 (q, *J* = 4.6 Hz), 92.9. **HRMS (ESI)**: calc. for C20H11F5IN2 [M+H]+: 500.9882; found: 500.9876.

**2-iodo-1-(trifluoromethyl)-5,6-bis(4-(trifluoromethyl)phenyl)-1H-benzo[d]imidazole (37)**

The title compound was obtained in 42% yield (25.5 mg) as a white solid after column chromatography (eluent = petroleum ether/ethyl acetate 15:1 v/v). **1H NMR** (400 MHz, Chloroform-*d*) δ 7.80 (s, 1H), 7.64 (q, *J* = 1.8 Hz, 1H), 7.53 – 7.50 (m, 4H), 7.27 – 7.23 (m, 4H). **19F NMR** (376 MHz, Chloroform-*d*) δ -51.81 (s, 3F), -62.53 (s, 3F), -62.55 (s, 3F). **13C NMR** (101 MHz, Chloroform-*d*) δ 145.0, 144.2, 144.0, 137.4, 136.7, 133.8, 130.49, 130.45, 129.6 (d, *J* = 32.7 Hz), 129.5 (q, *J* = 32.6 Hz), 125.4 (q, *J* = 3.7 Hz), 124.19 (q, *J* = 272.2 Hz), 124.15 (q, *J* = 272.3 Hz)**,** 121.7, 119.0 (q, *J* = 266.7 Hz), 113.8 (q, *J* = 4.7 Hz), 93.7. **HRMS (ESI)**: calc. for C22H11F9IN2 [M+H]+: 600.9818; found: 600.9816.

**2-iodo-5,6-bis(4-methoxyphenyl)-1-(trifluoromethyl)-1H-benzo[d]imidazole (38)**

The title compound was obtained in 59% yield (30.9 mg) as a white solid after column chromatography (eluent = petroleum ether/ethyl acetate 15:1 v/v). **1H NMR** (400 MHz, Chloroform-*d*) δ 7.74 (s, 1H), 7.58 (q, *J* = 1.9 Hz, 1H), 7.09 – 7.03 (m, 4H), 6.82 – 6.76 (m, 4H), 3.79 (s, 3H), 3.79 (s, 3H). **19F NMR** (376 MHz, Chloroform-*d*) δ -51.77 (d, *J* = 1.6 Hz). **13C NMR** (101 MHz, Chloroform-*d*) δ 158.7, 158.6, 144.4, 138.7, 137.8, 133.6, 133.4, 133.2, 131.23, 131.21, 121.2, 119.0 (q, *J* = 266.2 Hz), 113.6, 113.3 (q, *J* = 4.6 Hz), 92.2, 55.33, 55.31. **HRMS (ESI)**: calc. for C22H17F3IN2O2 [M+H]+: 525.0281; found: 525.0274.

**2-iodo-5,6-bis(4-nitrophenyl)-1-(trifluoromethyl)-1H-benzo[d]imidazole (39)**

The title compound was obtained in 39% yield (21.5 mg) as a white solid after column chromatography (eluent = petroleum ether/ethyl acetate 5:1 v/v). **1H NMR** (400 MHz, Chloroform-d) δ 7.74 (s, 1H), 7.58 (q, *J* = 1.9 Hz, 1H), 7.10 – 7.03 (m, 4H), 6.82 – 6.75 (m, 4H), 3.79 (s, 3H), 3.79 (s, 3H).**19F NMR** (376 MHz, DMSO-*d*6) δ -50.99. **13C NMR** (101 MHz, Chloroform-*d*) δ 146.8, 146.7, 146.40, 146.35, 144.8, 135.5, 135.1, 133.1, 131.4, 131.3, 123.4, 123.3, 121.1, 118.7 (q, *J* = 265.5 Hz), 113.6 (q, *J* = 4.4 Hz), 104.6. **HRMS (ESI)**: calc. for C20H11F3IN4O4 [M+H]+: 554.9772; found: 554.9738.

1. Synthesis and characterization of compounds 28-35

**4.1 Synthesis of compound 28**

Under an argon atmosphere, compound **15** (25.7 mg, 0.05 mmol, 1.0 equiv), benzenethiol (0.05 mmol, 1.0 equiv), NaO*t*Bu (0.075 mmol, 1.5 equiv) and MeCN (1.0 mL) were added to a 15-mL Schlenk tube equipped with a magnetic stir bar. The mixture was stirred at 60°C for 6 h. After cooling to room temperature, the solvent was removed under reduced pressure. The residue was purified by column chromatography on silica gel with eluent (petroleum ether/ethyl acetate 3:1 v/v) to afford the pure product **28** in 90% yield (17.5 mg). **1H NMR** (500 MHz, Chloroform-*d*) δ 8.19 (s, 1H), 7.82 (s, 1H), 7.55 (s, 1H), 7.50 – 7.45 (m, 4H), 7.18 - 7.14 (m, 4H). **19F NMR** (376 MHz, Chloroform-*d*) δ -55.35 (d, *J* = 1.5 Hz). **13C NMR** (126 MHz, Chloroform-*d*) δ 145.2, 143.9, 140.0, 136.9, 136.2, 132.2, 130.9, 130.5, 118.7 (q, *J* = 264.4 Hz), 118.6, 118.5, 113.3 (q, *J* = 1.8 Hz), 111.5, 111.3. **HRMS (ESI)**: calc. for C22H12F3N4 [M+H]+: 389.1009; found: 389.0994.

**4.2 Synthesis of compound 29**

Under an argon atmosphere, compound **15** (25.7 mg, 0.05 mmol, 1.0 equiv), EtONa (0.055 mmol, 1.1 equiv), Cs2CO3 (0.02 mmol, 0.4 equiv) and EtOH (1.0 mL) were added to a 15-mL Schlenk tube equipped with a magnetic stir bar. The mixture was stirred at 60 °C for 6 h. After cooling to room temperature, the solvent was removed under reduced pressure. The residue was purified by column chromatography on silica gel with eluent (petroleum ether/ethyl acetate 10:1 v/v) to afford the pure product **29** in 70% yield (15.1 mg). **1H NMR** (400 MHz, Chloroform-*d*) δ 7.56 (s,1H), 7.57 – 7.49 (m, 4H), 7.42 (q, *J* = 1.6 Hz, 1H), 7.25 – 7.18 (m, 4H), 4.71 (q, *J* = 7.1 Hz, 2H), 1.54 (t, *J* = 7.1 Hz, 3H). **19F NMR** (376 MHz, Chloroform-*d*) δ -55.35 (d, *J* = 1.5 Hz). **13C NMR** (126 MHz, Chloroform-*d*) δ 156.0, 145.8, 145.7, 140.5, 135.3, 134.0, 132.2, 130.9, 130.8, 120.4, 118.73, 118.70, 116.7 (q, *J* = 264.7 Hz), 113.2 (q, *J* = 4.1 Hz), 111.0, 68.4, 14.5. **HRMS (ESI)**: calc. for C24H16F3N4O [M+H]+ 433.1271; found: 433.1267.

**4.3 Synthesis of compound 30**

Under an argon atmosphere, compound **15** (25.7 mg, 0.05 mmol, 1.0 equiv), phenol (0.15 mmol, 3.0 equiv), NaO*t*Bu (0.075 mmol, 1.5 equiv) and anhydrous MeCN (2.0 mL) were added to a 15-mL Schlenk tube equipped with a magnetic stir bar. The mixture was stirred at 60 °C overnight. After cooling to room temperature, the solvent was removed under reduced pressure. The residue was purified by column chromatography on silica gel with eluent (petroleum ether/ethyl acetate 10:1 v/v) to afford the pure product **30** in 86% yield (20.7 mg).**1H NMR** (400 MHz, Chloroform-*d*) δ 7.60 (s, 1H), 7.56 (d, *J* = 8.1 Hz, 2H), 7.52 (d, *J* = 8.1 Hz, 2H), 7.53 – 7.50 (m, 2H), 7.49 (s, 1H), 7.45 – 7.41 (m, 2H), 7.37 – 7.34 (m, 1H), 7.23 (d, *J* = 8.1 Hz, 2H), 7.18 (d, *J* = 8.2 Hz, 2H). **19F NMR** (376 MHz, Chloroform-*d*) δ -54.92. **13C NMR** (101 MHz, Chloroform-*d*) δ 154.6, 152.8, 145.6, 145.4, 139.9, 135.7, 134.8, 132.21, 132.19, 130.9, 130.8, 130.2, 126.9, 121.3, 120.5, 118.8 (q, *J* = 265.7 Hz), 118.7, 113.4 (q, *J* = 4.1 Hz), 111.14, 111.07. **HRMS (ESI)**: calc. for C28H16F3N4O [M+H]+: 481.1271; found: 481.1264.

**4.4 Synthesis of compound 31**

Under an argon atmosphere, compound **15** (25.7 mg, 0.05 mmol, 1.0 equiv), morpholine (0.15mmol, 3.0 equiv) and anhydrous DMF (1.0 mL) were added to a 15-mL Schlenk tube equipped with a magnetic stir bar. The mixture was stirred at 60 °C overnight. After cooling to room temperature, the reaction mixture was quenched by the addition of a saturated aqueous solution of NaCl (10.0 mL) and then extracted with ethyl acetate. The combined organic layers were dried over Na2SO4 and concentrated under reduced pressure. The residue was purified by column chromatography on silica gel with eluent (petroleum ether/ethyl acetate 3:1 v/v) to afford the pure product **31** in 85% yield (20.1 mg). **1H NMR** (500 MHz, Chloroform-*d*) δ 7.60 (s, 1H), 7.54 (d, *J* = 8.3 Hz, 2H), 7.53 (d, *J* = 8.1 Hz, 2H), 7.45 (s, 1H), 7.21 (d, *J* = 8.3 Hz, 2H), 7.21 (d, *J* = 8.1 Hz, 2H), 3.88 (t, *J* = 4.6 Hz, 4H), 3.45 (t, *J* = 4.6 Hz, 4H). **19F NMR** (376 MHz, Chloroform-*d*) δ -54.54. **13C NMR** (126 MHz, Chloroform-*d*) δ 156.5, 145.7, 145.6, 142.1, 135.9, 134.3, 132.4, 132.18, 132.16, 130.9, 130.8, 120.5, 119.2 (q, *J* = 264.8 Hz), 118.7, 118.7, 114.4 (q, *J* = 3.7 Hz), 111.03, 111.02, 66.3, 51.5. **HRMS (ESI)**: calc. for C26H19F3N5O [M+H]+: 474.1536; found: 474.1532.

**4.5 Synthesis of compound 32**

Under an argon atmosphere, compound **15** (25.7 mg, 0.05 mmol, 1.0 equiv), benzylamine (0.075 mmol, 1.5 equiv) and EtOH (1.0 mL) were added to a 15-mL Schlenk tube equipped with a magnetic stir bar. The mixture was stirred at 130 °C for 16 h. After cooling to room temperature, the solvent was removed under reduced pressure. The residue was purified by column chromatography on silica gel with eluent (petroleum ether/ethyl acetate 3:1 v/v) to afford the pure product **32** in 51% yield (12.6 mg). **1H NMR** (500 MHz, Chloroform-*d*) δ 7.53 (d, *J* = 8.4 Hz, 4H), 7.50 (s, 1H), 7.44 – 7.34 (m, 6H), 7.21 (d, *J* = 8.2 Hz, 4H), 5.31 (t, *J* = 5.9 Hz, 1H), 4.80 (d, *J* = 5.3 Hz, 2H). **19F NMR** (376 MHz, Chloroform-*d*) δ -54.80. **13C NMR** (126 MHz, Chloroform-*d*) δ 152.1, 146.0, 145.9, 143.1, 137.3, 135.6, 132.5, 132.1, 131.3, 130.9, 130.8, 129.1, 128.2, 127.9, 119.6 (d, *J* = 263.4 Hz), 119.2, 118.8, 112.7 (q, *J* = 4.2, 3.5 Hz), 110.8, 110.7, 47.8, 29.8. **HRMS (ESI)**: calc. for C29H19F3N5 [M+H]+: 494.1587; found: 494.1566.

**4.6 Synthesis of compound 33**

Under an argon atmosphere, compound **15** (25.7 mg, 0.05 mmol, 1.0 equiv), 1-ethyl-4-ethynylbenzene (0.15 mmol, 3.0 equiv), Pd(PPh3)2Cl2 (2.6 mol%), CuI (4.2 mol%) and Et3N (1.0 mL) were added to a 15-mL Schlenk tube equipped with a magnetic stir bar. The mixture was stirred at room temperature for 6 h. After completion, the solvent was removed under reduced pressure. The residue was purified by column chromatography on silica gel with eluent (petroleum ether/ethyl acetate 10:1 v/v) to afford the pure product **33** in 78% yield (20.1 mg). **1H NMR** (400 MHz, Chloroform-*d*) δ 7.8 (s, 1H), 7.61 – 7.55 (m, 7H), 7.3 – 7.2 (m, 6H), 2.7 (q, *J* = 7.6 Hz, 2H), 1.3 (t, *J* = 7.6 Hz, 3H). **19F NMR** (376 MHz, Chloroform-*d*) δ -53.91. **13C NMR** (126 MHz, Chloroform-*d*) δ 147.7, 145.3, 145.1, 142.9, 137.3, 136.5, 135.7, 132.6, 132.2, 131.6, 130.86, 130.85, 128.5, 122.6, 119.1 (q, *J* = 266.3 Hz), 118.6, 118.6, 117.4, 113.7 (q, *J* = 3.8 Hz), 111.4, 111.3, 98.1, 29.2, 15.3. **HRMS (ESI)**: calc. for C32H20F3N4 [M+H]+: 517.1635; found: 517.1622.

**4.7 Synthesis of compound 34**

Under an argon atmosphere, compound **15** (25.7 mg, 0.05 mmol, 1.0 equiv), (4-methoxyphenyl)boronic acid (0.15 mmol, 3.0 equiv), Pd(PPh3)2Cl2 (10 mol%), SPhos (15 mol%), K3PO4(0.075 mmol, 1.5 equiv), Ag2O (0.125 mmol, 2.5 equiv) and THF (1.0 mL) were added to a 15-mL Schlenk tube equipped with a magnetic stir bar. The mixture was stirred at 60 °C for 12 h. After cooling to room temperature, the solvent was removed under reduced pressure. The residue was purified by column chromatography on silica gel with eluent (petroleum ether/ethyl acetate 10:1 v/v) to afford the pure product **34** in 36% yield (8.9 mg). **1H NMR** (400 MHz, Chloroform-*d*) δ 7.86 (s, 1H), 7.71 (d, *J* = 8.5 Hz, 2H), 7.66 (q, *J* = 1.9 Hz, 1H), 7.61 – 7.54 (m, 4H), 7.31 – 7.22 (m, 4H), 7.05 (d, *J* = 8.8 Hz, 2H), 3.91 (s, 3H). **19F NMR** (376 MHz, Chloroform-*d*) δ -50.97. **13C NMR** (126 MHz, Chloroform-*d*) δ 161.9, 153.6, 145.6, 145.4, 142.9, 136.1, 133.0, 132.2, 131.1 (q, *J* = 1.5 Hz), 131.0, 130.9, 122.3, 119.4 (q, *J* = 265.6 Hz), 118.7, 118.6, 114.5 (q, *J* = 4.0 Hz), 114.2, 111.3, 111.2, 55.6. **HRMS (ESI)**: calc. for C29H18F3N4O [M+H]+: 495.1427; found: 495.1416.

**4.8 Synthesis of compound 35**

Under an argon atmosphere, compound **15** (25.7 mg, 0.05 mmol, 1.0 equiv), thiophen-2-ylboronic acid (0.15 mol, 3.0 equiv), Pd(PPh3)2Cl2 (10 mol%), SPhos (15 mol%), K3PO4(0.075 mmol, 1.5 equiv), Ag2O (0.125 mmol, 2.5 equiv) and THF (1.0 mL) were added to a 15-mL Schlenk tube equipped with a magnetic stir bar. The mixture was stirred at 60 °C for 12 h. After cooling to room temperature, the solvent was removed under reduced pressure. The residue was purified by column chromatography on silica gel with eluent (petroleum ether/ethyl acetate 10:1 v/v) to afford the pure product **35** in 43% yield (10.1 mg).**1H NMR** (400 MHz, Chloroform-*d*) δ 7.9 (s, 1H), 7.7 – 7.6 (m, 2H), 7.6 (dd, *J* = 5.0, 1.0 Hz, 1H), 7.6 – 7.5 (m, 6H), 7.3 – 7.2 (m, 6H). **19F NMR** (376 MHz, Chloroform-*d*) δ -51.19. **13C NMR** (126 MHz, Chloroform-*d*) δ 147.3, 145.5, 145.2, 142.6, 136.5, 136.2, 133.1, 132.3, 130.9, 130.82, 130.78, 130.2 (q, *J* = 4.3, 3.8 Hz), 128.3, 122.3, 119.5 (q, *J* = 266.1 Hz), 118.7, 118.6, 114.6 (q, *J* = 5.2 Hz), 111.3, 111.2. **HRMS (ESI)**: calc. for C26H14F3N4S [M+H]+: 471.0886; found: 471.0878.

1. References

[1] H. Sakai, S. Shinto, Y. Araki, T. Wada, T. Sakanoue, T. Takenobu, T. Hasobe, *Chemistry* **2014**, *20*, 10099–10109.

[2] a) D. Leifert, A. Studer, *Angew. Chem., Int. Ed.* **2016**, *55*, 11660–11663; b) Y. Yuan, S. Y. Zhang, W. H. Dong, F. Wu, X. M. Xie, Z. G. Zhang, *Adv. Synth. Catal.* **2021**, *363*, 4216–4221.

[3] J.-Y. Li, J.-L. Fu, H.-C. Liu, H. Wang, Q. Li, *Org Lett*. **2026**, *28*, DOI: 10.1021/acs.orglett.6c01137.

1. NMR spectrum of starting materials and products

**1H NMR of compound S1** (400 MHz, Chloroform-*d*)

**19F NMR of compound S1** (376 MHz, Chloroform-*d*)

**13C NMR of compound S1** (101 MHz, Chloroform-*d*)

**1H NMR of compound S2** (500 MHz, Chloroform-*d*)

**19F NMR of compound S2** (376 MHz, Chloroform-*d*)

**13C NMR of compound S2** (126 MHz, Chloroform-*d*)

**1H NMR of compound S3** (400 MHz, Chloroform-*d*)

**13C NMR of compound S3** (101 MHz, Chloroform-*d*)

**1H NMR of compound S4** (500 MHz, DMSO-*d*6)

**13C NMR of compound S4** (126 MHz, DMSO-*d*6)

**1H NMR** **of compound 36** (400 MHz, Chloroform-*d*)

**19F NMR of compound 36** (376 MHz, Chloroform-*d*)

**13C NMR of compound 36** (126 MHz, Chloroform-*d*)

**1H NMR of compound 37** (400 MHz, Chloroform-*d*)

**19F NMR of compound 37** (376 MHz, Chloroform-*d*)

**13C NMR of compound 37** (101 MHz, Chloroform-*d*)

**1H NMR of compound 38** (400 MHz, Chloroform-*d*)

**19F NMR of compound 38** (376 MHz, Chloroform-*d*)

**13C NMR of compound 38** (101 MHz, Chloroform-*d*)

**1H NMR of compound 39** (400 MHz, DMSO-*d*6)

**19F NMR of compound 39** (376 MHz, DMSO-*d*6)

**13C NMR of compound 39** (101 MHz, Chloroform-*d*)

**1H NMR of compound 28** (500 MHz, Chloroform-*d*)

**19F NMR of compound 28** (376 MHz, Chloroform-*d*)

**13C NMR of compound 28** (126 MHz, Chloroform-*d*)

**1H NMR of compound 29** (400 MHz, Chloroform-*d*)

**19F NMR of compound 29** (376 MHz, Chloroform-*d*)

**13C NMR of compound 29** (126 MHz, Chloroform-*d*)

**1H NMR** **of compound 30** (400 MHz, Chloroform-*d*)

**19F NMR of compound 30** (376 MHz, Chloroform-*d*)

**13C NMR of compound 30** (101 MHz, Chloroform-*d*)

**1H NMR of compound 31** (500 MHz, Chloroform-*d*)

**19F NMR of compound 31** (376 MHz, Chloroform-*d*)

**13C NMR of compound 31** (126 MHz, Chloroform-*d*)

**1H NMR of compound 32** (500 MHz, Chloroform-*d*)

**19F NMR of compound 32** (376 MHz, Chloroform-*d*)

**13C NMR of compound 32** (126 MHz, Chloroform-*d*)

**1H NMR of compound 33** (400 MHz, Chloroform-*d*)

**19F NMR of compound 33** (376 MHz, Chloroform-*d*)

**13C NMR of compound 33** (126 MHz, Chloroform-*d*)

**1H NMR of compound 34** (400 MHz, Chloroform-*d*)

**19F NMR of compound 34** (376 MHz, Chloroform-*d*)

**13C NMR of compound 34** (126 MHz, Chloroform-*d*)

**1H NMR of compound 35** (400 MHz, Chloroform-*d*)

**19F NMR of compound 35** (376 MHz, Chloroform-*d*)

**13C NMR of compound 35** (126 MHz, Chloroform-*d*)
